# Supplementary material
Source: publisher figshare collection journal article supplement (https://acs.figshare.com/ndownloader/files/4157329)
Supplement: Supplementary file 1 [file 4157329]

For those compounds which standards were available, concentration was reported as mg/g dry weight calculated from the prepared standard curve. The remaining compounds were quantified against an appropriate standard. Pelargonidin-containing compounds were quantified as mg/g dry weight pelargonidin equivalents; cyanidin-3-2<sup>G</sup>-glucosylrutinoside was quantified as mg/g dry weight cyanidin-3-glucoside equivalents, and kaempferol-3-glucuronide was quantified as mg/g dry weight quercetin-3-glucoside equivalents.

**Table 2.** Concentration (mg/g DW±standard error) of flavonoid compounds in three raspberry cultivars quantified by LC-TOF-MS and comparison to external standards.\* Shaded rows were quantified as equivalents of a different, but related, standard.

| Compound                                             | Autumn Britten            | Caroline                  | Nantahala                 |
|------------------------------------------------------|---------------------------|---------------------------|---------------------------|
| <b>Cyanidin-3-glucoside*</b>                         | 2.510±0.149 <sub>b</sub>  | 5.039±0.305 <sub>a</sub>  | 2.552±0.071 <sub>b</sub>  |
| <b>Cyanidin-3-(2<sup>G</sup>-glucosylrutinoside)</b> | 14.131±1.223 <sub>a</sub> | 3.873±0.275 <sub>b</sub>  | 11.522±3.011 <sub>a</sub> |
| <b>Cyanidin-3-rutinoside*</b>                        | 0.132±0.016 <sub>a</sub>  | 0.044±0.004 <sub>b</sub>  | 0.036±0.015 <sub>b</sub>  |
| <b>Cyanidin-3-sambubioside*</b>                      | 2.763±0.884 <sub>b</sub>  | 0.832±0.124 <sub>b</sub>  | 8.909±1.131 <sub>a</sub>  |
| <b>Cyanidin-3-sophoroside*</b>                       | 1.716±0.143 <sub>c</sub>  | 5.878±0.450 <sub>a</sub>  | 2.622±0.213 <sub>b</sub>  |
| <b>Kaempferol-3-glucuronide</b>                      | 0.101±0.009 <sub>a</sub>  | 0.113±0.008 <sub>a</sub>  | 0.148±0.012 <sub>a</sub>  |
| <b>Quercetin-3-glucoside*</b>                        | 0.031±0.006 <sub>a</sub>  | 0.028±0.005 <sub>ab</sub> | 0.014±0.002 <sub>b</sub>  |
| <b>Pelargonidin-3-glucoside</b>                      | 0.196±0.006 <sub>b</sub>  | 0.212±0.006 <sub>ab</sub> | 0.226±0.008 <sub>a</sub>  |
| <b>Pelargonidin-3-rutinoside</b>                     | 0.222±0.010 <sub>a</sub>  | 0.154±0.001 <sub>b</sub>  | 0.215±0.023 <sub>a</sub>  |
| <b>Pelargonidin-3-sophoroside</b>                    | 0.503±0.042 <sub>a</sub>  | 0.270±0.008 <sub>b</sub>  | 0.253±0.038 <sub>b</sub>  |

\*Data values for each cultivar are the mean of 18 samples, averaged across harvest locations. Concentrations within the same row labeled with the same letter are not significantly different (p<0.05).
